# Supplementary material for: Reference Values to Assess Hemodilution and Warn of Potential False-Negative Minimal Residual Disease Results in Myeloma
Source: MDPI journal article supplement (doi:10.3390/cancers13194924), 2021-09-30

**Supplemental Figure S1.** Bivariate flow cytometry dot plots illustrating the performance of the first 8-color antibody combination of the Euroflow approach for minimal residual disease assessment in myeloma to enumerate mast cells (CD117bright, CD45dim; in red), nucleated red blood cells (CD45-, CD38-, CD117-/+, SSClo; in yellow), and B-cell precursors (CD19+, CD45dim, CD38bright, CD81bright and CD27-; in blue). Other leukocyte populations are depicted as grey dots.

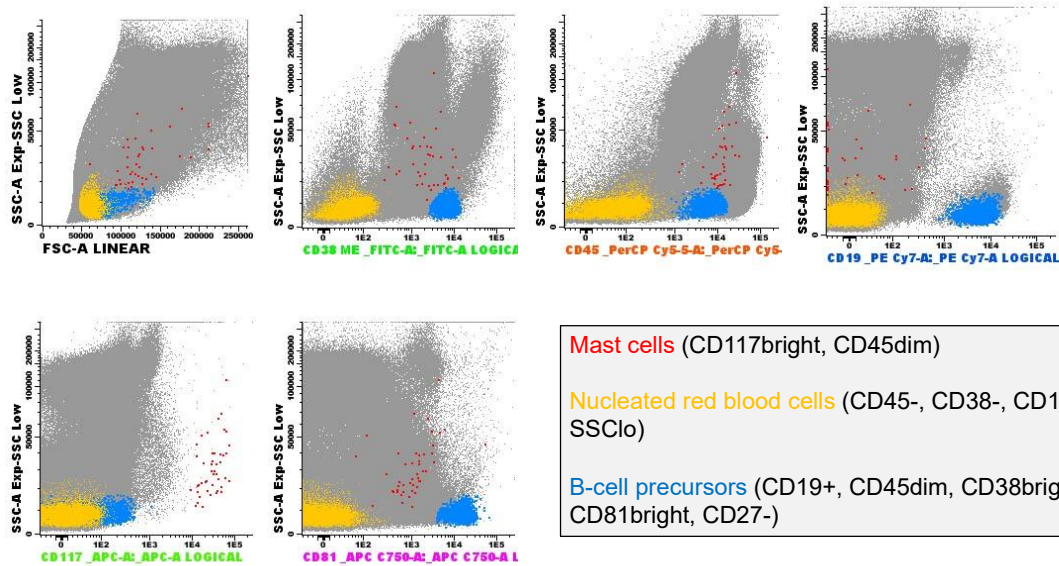

Supplement: s1 [file s1]
